# Supplementary material for: GATA2 deficiency phenotype associated with tandem duplication of GATA2 and overexpression of GATA2-AS1
Source: PubMed Central journal article supplement — Blood Adv. 2021 Dec 28;5(24):5631–5. doi: 10.1182/bloodadvances.2021005217 (PMC8714714; doi:10.1182/bloodadvances.2021005217), 2021-12-28
Supplement: advancesADV2021005217-suppl1.pdf [file advancesADV2021005217-suppl1.pdf]

## Supplementary Table 1

### Summary of fusion transcript analysis using RNAseq

| <b>Sample</b>        | <b>Uniquely mapped paired-end reads</b> | <b>total fusions detected</b> | <b>fusions involving GATA2</b> | <b>fusions involving RPN1</b> |
|----------------------|-----------------------------------------|-------------------------------|--------------------------------|-------------------------------|
| patient fibroblast   | 140,174,093                             | 41                            | 0                              | 0                             |
| control fibroblast 1 | 134,800,218                             | 39                            | 0                              | 0                             |
| control fibroblast 2 | 158,557,437                             | 51                            | 0                              | 0                             |
| patient PBMC         | 122,018,559                             | 11                            | 0                              | 0                             |
| control PBMC 1       | 155,564,573                             | 63                            | 0                              | 0                             |
| control PBMC 2       | 152,287,586                             | 43                            | 0                              | 0                             |
